# Supplementary material for: Effect of Boiling on the Nutrient Composition of Solanum Torvum
Source: Hindawi journal article supplement (doi:10.1155/2022/7539151), 2022-03-16
Supplement: f1 [file 7539151.f1.pdf]

## Effect of boiling on the nutrient composition of *Solanum torvum*

Janice Dwomoh Abraham, Emmanuel Sekyere, Isaac Gyamerah

### Supplementary data

Data supporting Table 1. Concentration (mg/Kg) of micronutrient in *Solanum torvum*

#### Cu (mg/Kg)

| Replicate | Fresh leaves | Fresh fruits | Boiled leaves | Boiled fruits |
|-----------|--------------|--------------|---------------|---------------|
| 1         | 10.2         | 14.6         | 17            | 8.8           |
| 2         | 26.4         | 15.6         | 2.6           | 11            |
| 3         | 17.6         | 17           | 8.8           | 21.2          |
| 4         | 10.2         | 19.4         | 6.6           | 10.2          |
| 5         | 12.6         | 16.8         | 15.2          | 14.8          |
| 6         | 20.6         | 6.4          | 1.6           | 11.4          |

#### Zn (mg/Kg)

| Replicate | Fresh leaves | Fresh fruits | Boiled leaves | Boiled fruits |
|-----------|--------------|--------------|---------------|---------------|
| 1         | 10.26        | 16.4         | 25.62         | 15.28         |
| 2         | 19.64        | 12.7         | 9.48          | 9.94          |
| 3         | 16.02        | 18.14        | 14.1          | 17.16         |
| 4         | 16.1         | 20.56        | 11.42         | 16.86         |
| 5         | 13.32        | 19.36        | 21.8          | 19.3          |
| 6         | 20.8         | 12.34        | 8.26          | 18.36         |

#### Fe (mg/Kg)

| Replicate | Fresh leaves | Fresh fruits | Boiled leaves | Boiled fruits |
|-----------|--------------|--------------|---------------|---------------|
| 1         | 117          | 173.2        | 554           | 184.4         |
| 2         | 295.6        | 197.4        | 142           | 216.4         |
| 3         | 274.2        | 235          | 250.6         | 210.6         |
| 4         | 130.4        | 263.4        | 162           | 126.6         |
| 5         | 141.4        | 238.6        | 385           | 211.6         |
| 6         | 400.4        | 143          | 151.8         | 205.8         |

#### Mn (mg/Kg)

| Replicate | Fresh leaves | Fresh fruits | Boiled leaves | Boiled fruits |
|-----------|--------------|--------------|---------------|---------------|
| 1         | 63.2         | 91.8         | 136.2         | 101.6         |
| 2         | 127.4        | 90           | 62.2          | 74.4          |
| 3         | 102          | 111.8        | 92.6          | 117           |
| 4         | 103.6        | 178.2        | 92.6          | 71.6          |
| 5         | 60.4         | 95.6         | 152.2         | 87            |
| 6         | 114.6        | 49.6         | 59            | 95.8          |

Data supporting Table 2. Concentration (%) of macronutrient in *Solanum torvum*

% Na

| Rep | Fresh leaves | Fresh fruits | Boiled leaves | Boiled fruits |
|-----|--------------|--------------|---------------|---------------|
| 1   | 0.1746       | 0.2716       | 0.2056        | 0.1142        |
| 2   | 0.3718       | 0.151        | 0.2202        | 0.2226        |
| 3   | 0.2344       | 0.2708       | 0.293         | 0.378         |
| 4   | 0.1924       | 0.3206       | 0.426         | 0.6012        |
| 5   | 0.205        | 0.3246       | 0.2362        | 0.4274        |
| 6   | 0.2436       | 0.547        | 0.2356        | 0.1722        |

% Mg

| Rep | Fresh leaves | Fresh fruits | Boiled leaves | Boiled fruits |
|-----|--------------|--------------|---------------|---------------|
| 1   | 0.228        | 0.399        | 0.266         | 0.399         |
| 2   | 0.494        | 0.228        | 0.19          | 0.19          |
| 3   | 0.418        | 0.38         | 0.19          | 0.266         |
| 4   | 0.342        | 0.532        | 0.19          | 0.304         |
| 5   | 0.152        | 0.304        | 0.494         | 0.209         |
| 6   | 0.342        | 0.095        | 0.19          | 0.361         |

% P

| Rep | Fresh leaves | Fresh fruits | Boiled leaves | Boiled fruits |
|-----|--------------|--------------|---------------|---------------|
| 1   | 0.4841848    | 0.6326056    | 0.7330048     | 0.569712      |
| 2   | 0.5273312    | 0.4474184    | 0.1423488     | 0.7681872     |
| 3   | 0.2668336    | 0.925848     | 0.1069904     | 0.5244184     |
| 4   | 0.5229576    | 0.4257088    | 0.4472336     | 0.4650184     |
| 5   | 0.984544     | 0.6405168    | 0.4972352     | 0.899888      |
| 6   | 0.669416     | 0.4150344    | 0.1005576     | 0.7112864     |

% Ca

| Rep | Fresh leaves | Fresh fruits | Boiled leaves | Boiled fruits |
|-----|--------------|--------------|---------------|---------------|
| 1   | 0.384        | 0.384        | 1.344         | 0.384         |
| 2   | 0.832        | 0.384        | 0.256         | 0.192         |
| 3   | 0.96         | 0.448        | 0.512         | 0.448         |
| 4   | 0.32         | 0.768        | 0.448         | 0.384         |
| 5   | 0.448        | 0.512        | 1.6           | 0.64          |
| 6   | 1.216        | 0.32         | 0.256         | 0.48          |

% K

| Rep | Fresh leaves | Fresh fruits | Boiled leaves | Boiled fruits |
|-----|--------------|--------------|---------------|---------------|
| 1   | 1.7398       | 1.6632       | 1.435         | 1.5336        |
| 2   | 1.7184       | 1.4626       | 1.4876        | 1.2958        |
| 3   | 1.4814       | 2.7986       | 1.3064        | 1.1866        |
| 4   | 1.615        | 1.623        | 0.9196        | 1.6096        |
| 5   | 1.7994       | 1.9516       | 1.3336        | 2.1616        |
| 6   | 2.423        | 1.5163       | 1.051         | 1.532         |

% SO<sub>4</sub>

| Rep | Fresh leaves | Fresh fruits | Boiled leaves | Boiled fruits |
|-----|--------------|--------------|---------------|---------------|
| 1   | 1.36         | 1.04         | 1.48          | 1             |
| 2   | 2.6          | 2.12         | 1.44          | 1.04          |
| 3   | 1.4          | 1.72         | 2.96          | 0.76          |
| 4   | 1.12         | 1.36         | 2.88          | 2.28          |
| 5   | 3.68         | 1.36         | 1.32          | 1.84          |
| 6   | 2.52         | 1.4          | 0.96          | 1.72          |

Data support Table 3. Nutritional composition (%) of *Solanum torvum*

| Sample      | Replicate | Moisture | Ash      | protein |
|-------------|-----------|----------|----------|---------|
| Fresh fruit | 1         | 79.88    | 0.067033 | 10.5    |
|             | 2         | 78.2     | 0.062734 | 12.5125 |
|             | 3         | 78.63    | 0.046498 | 10.7625 |
|             | 4         | 81.34    | 0.05424  | 11.6375 |
|             | 5         | 80.76    | 0.060355 | 9.8875  |
|             | 6         | 80.02    | 0.069939 | 9.0125  |

| Sample       | Replicate | Moisture | Ash      | protein |
|--------------|-----------|----------|----------|---------|
| Boiled fruit | 1         | 78.14    | 0.071582 | 12.25   |
|              | 2         | 80.89    | 0.060195 | 11.025  |
|              | 3         | 83.66    | 0.057853 | 12.775  |
|              | 4         | 83.6     | 0.048118 | 13.3875 |
|              | 5         | 87.86    | 0.0695   | 11.9    |
|              | 6         | 84.19    | 0.050592 | 13.65   |

| Sample       | Replicate | Moisture | Ash      | protein |
|--------------|-----------|----------|----------|---------|
| Fresh leaves | 1         | 84.4     | 0.050188 | 21.875  |
|              | 2         | 86.53    | 0.085466 | 15.1375 |
|              | 3         | 83.69    | 0.091705 | 17.5    |
|              | 4         | 79.57    | 0.030941 | 16.625  |
|              | 5         | 87.18    | 0.049444 | 14.2625 |
|              | 6         | 85.2     | 0.056496 | 16.8875 |

| Sample        | Replicate | Moisture | Ash      | protein |
|---------------|-----------|----------|----------|---------|
| Boiled leaves | 1         | 84.73    | 0.075363 | 17.625  |
|               | 2         | 86.74    | 0.068869 | 15.4    |
|               | 3         | 85.88    | 0.079554 | 17.5    |
|               | 4         | 86.85    | 0.079554 | 14.875  |
|               | 5         | 86.95    | 0.073853 | 14.2625 |
|               | 6         | 85.02    | 0.043714 | 16.625  |

| Sample      | crude fat | crude fibre | carbohydrate |
|-------------|-----------|-------------|--------------|
| Fresh fruit | 12.135    | 24.515      | 0.26298      |
|             | 5.05      | 20.12       | 0.30128      |
|             | 8.56      | 26.68       | 0.34403      |
|             | 9.485     | 29.155      | 0.38973      |

| Sample       | crude fat | crude fibre | carbohydrate |
|--------------|-----------|-------------|--------------|
| Boiled fruit | 7.455     | 25.06       | 0.30065      |
|              | 11.3      | 22.89       | 0.32125      |
|              | 6.095     | 25.155      | 0.33475      |
|              | 6.57      | 23.54       | 0.3968       |

| Sample       | crude fat | crude fibre | carbohydrate |
|--------------|-----------|-------------|--------------|
| Fresh leaves | 4.62      | 12.505      | 0.2842       |
|              | 7.46      | 13.795      | 0.31473      |
|              | 2.88      | 22.44       | 0.3568       |
|              | 6.04      | 16.32       | 0.21585      |

| Sample        | crude fat | crude fibre | carbohydrate |
|---------------|-----------|-------------|--------------|
| Boiled leaves | 7.54      | 14.66       | 0.32095      |
|               | 5.82      | 25.595      | 0.40445      |
|               | 5.755     | 21.74       | 0.38835      |
|               | 8.18      | 18.32       | 0.36185      |

Data supporting Table 4. Phytochemical screening of *Solanum torvum* fruit and leaves

| Sample ID       | Phytochemistry |          |            |                       | Glycosides                     |                  |
|-----------------|----------------|----------|------------|-----------------------|--------------------------------|------------------|
|                 | Saponins       | Tannins  | Flavonoids | Terpenoids / Steroids | H <sub>2</sub> SO <sub>4</sub> | H <sub>2</sub> O |
| Fresh fruits 1  | positive       | positive | negative   | negative              | Positive                       | positive         |
| Fresh fruits 2  | positive       | positive | negative   | negative              | Positive                       | positive         |
| Fresh fruits 3  | positive       | positive | negative   | negative              | Positive                       | positive         |
| Boiled fruits 1 | positive       | positive | negative   | negative              | negative                       | positive         |
| Boiled fruits 2 | positive       | positive | negative   | negative              | negative                       | positive         |
| Boiled fruits 3 | positive       | positive | negative   | negative              | negative                       | positive         |
| Fresh leaves 1  | positive       | positive | positive   | positive              | Positive                       | positive         |
| Fresh leaves 2  | positive       | positive | positive   | positive              | Positive                       | positive         |
| Fresh leaves 3  | positive       | positive | positive   | positive              | Positive                       | positive         |
| Boiled leaves 1 | positive       | positive | positive   | positive              | Positive                       | positive         |
| Boiled leaves 2 | positive       | positive | positive   | positive              | Positive                       | positive         |
| Boiled leaves 3 | positive       | positive | positive   | positive              | Positive                       | positive         |
